# Supplementary material
Source: PubMed Central journal article supplement (PMC7433006)

Supplementary Figure 1

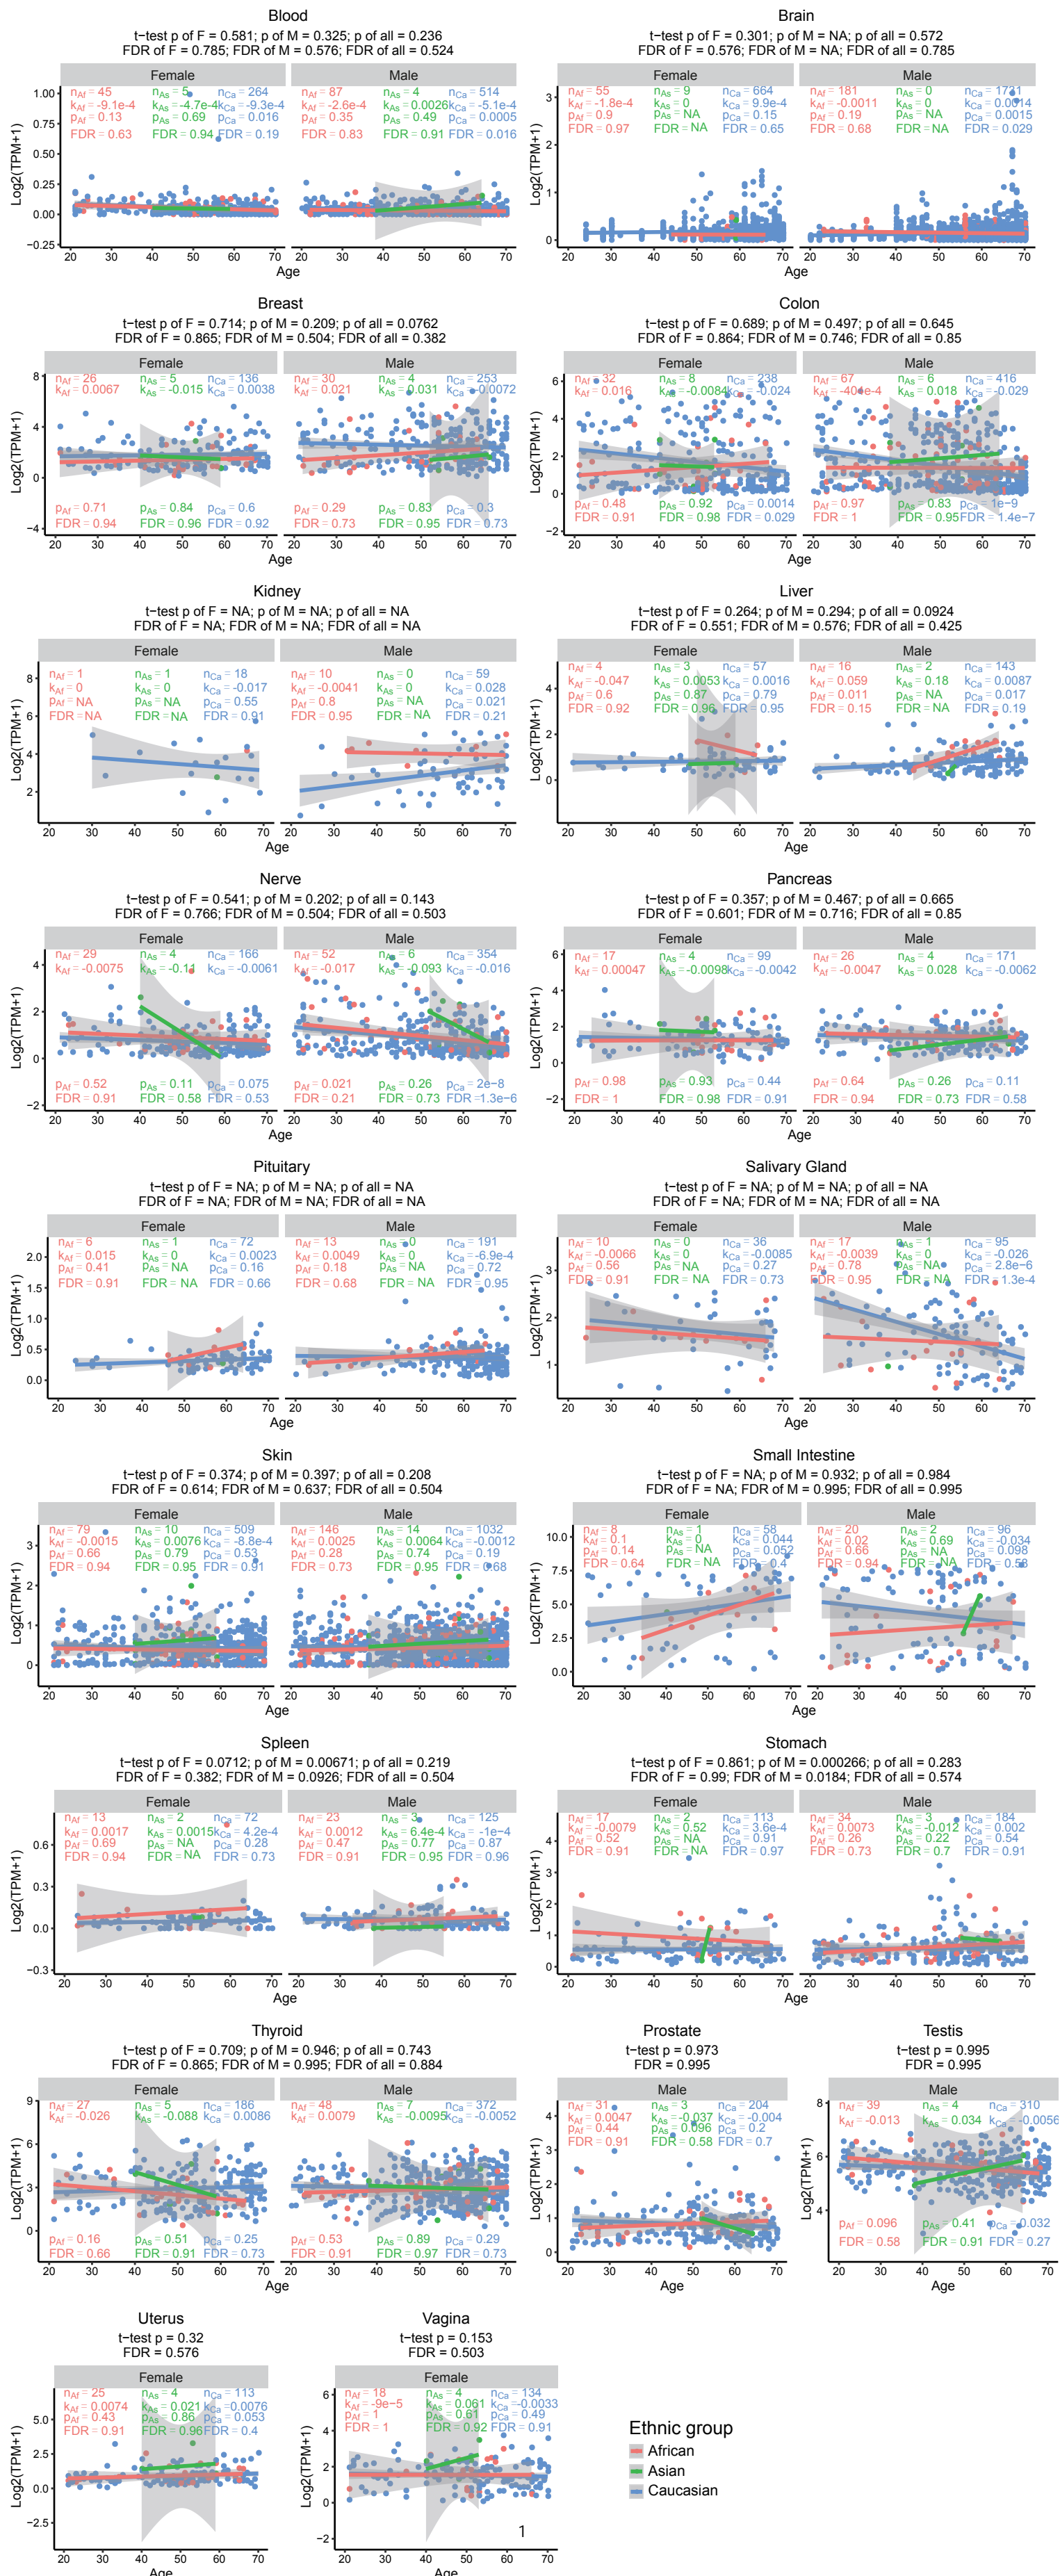

# Supplementary Figure 2

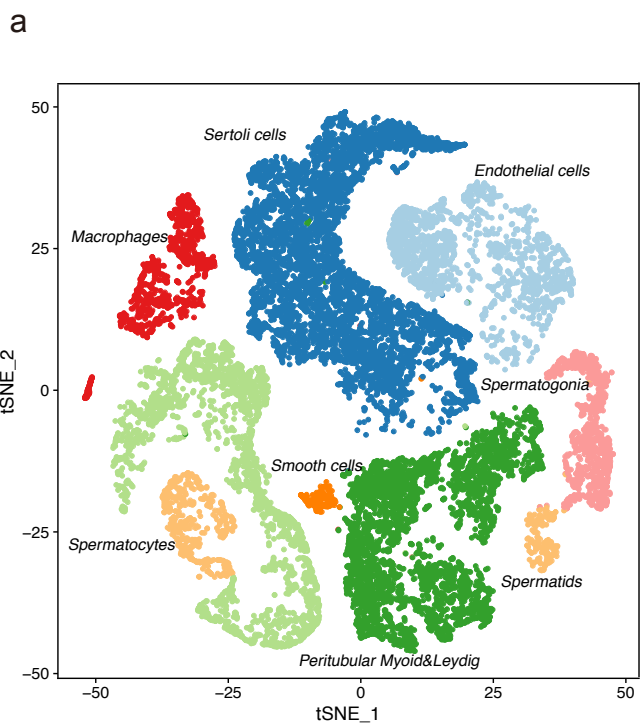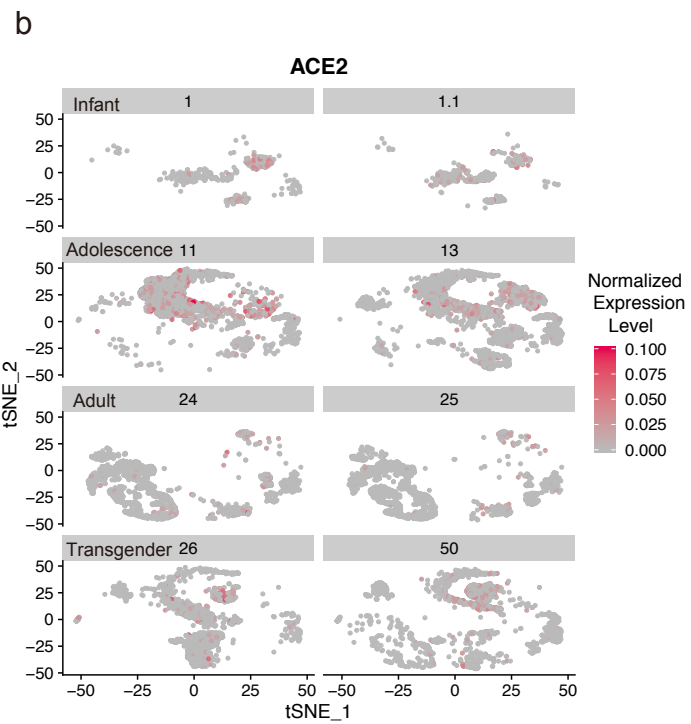

# Supplementary Figure 3

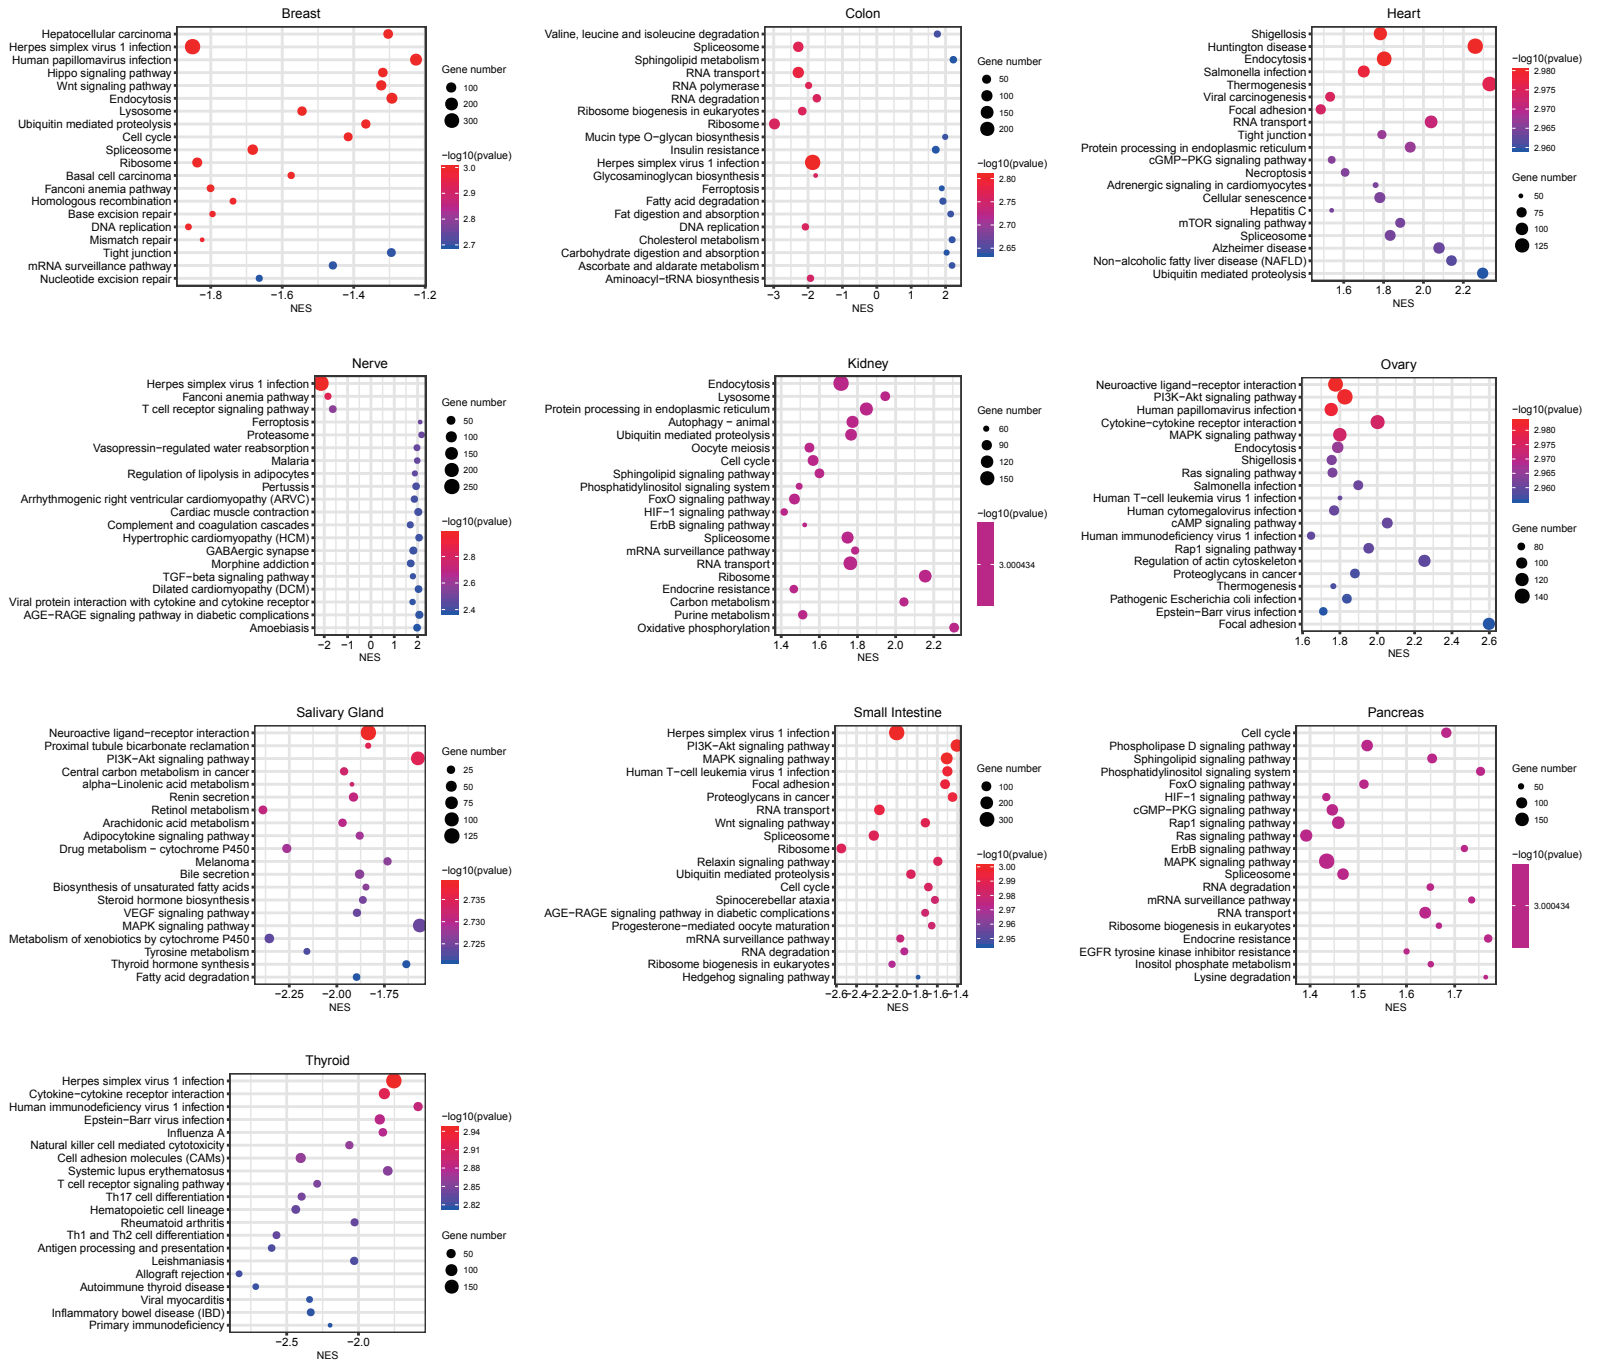

# Supplementary Figure 4

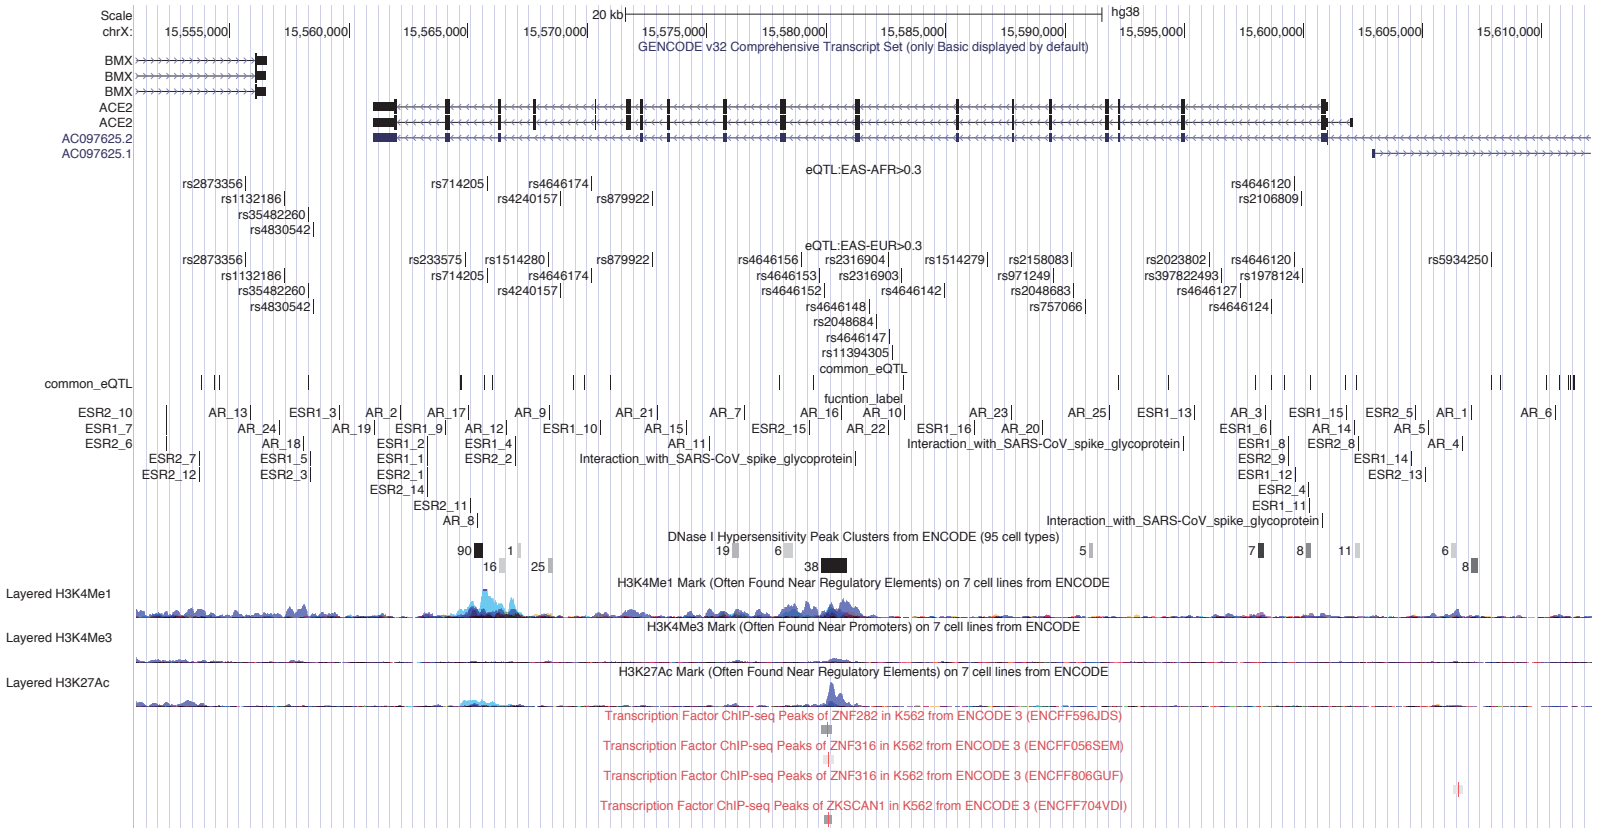

Supplementary Figure 5

a

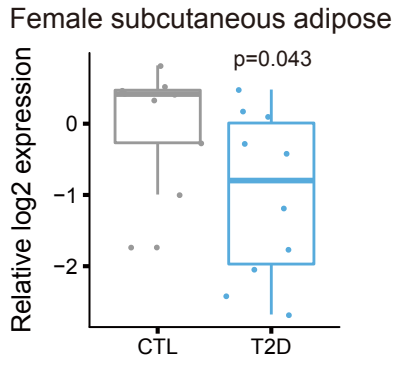

b

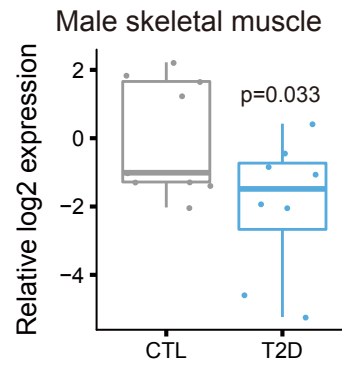

c

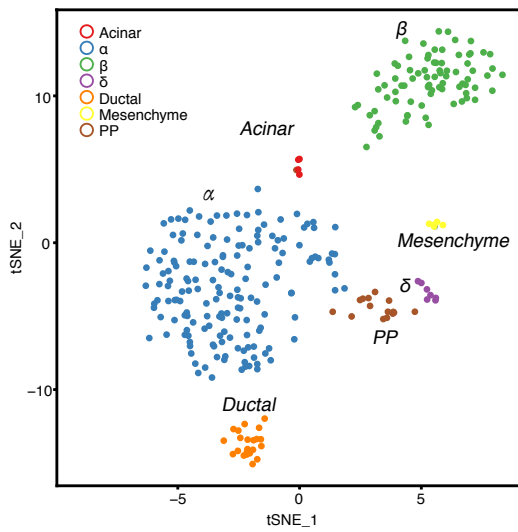

d

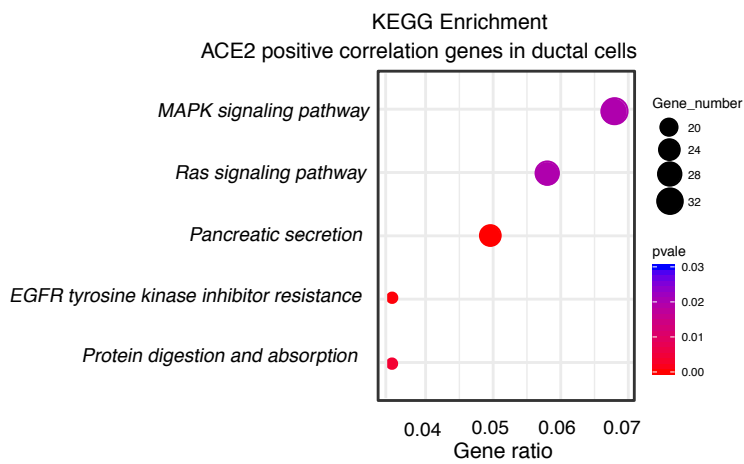

e

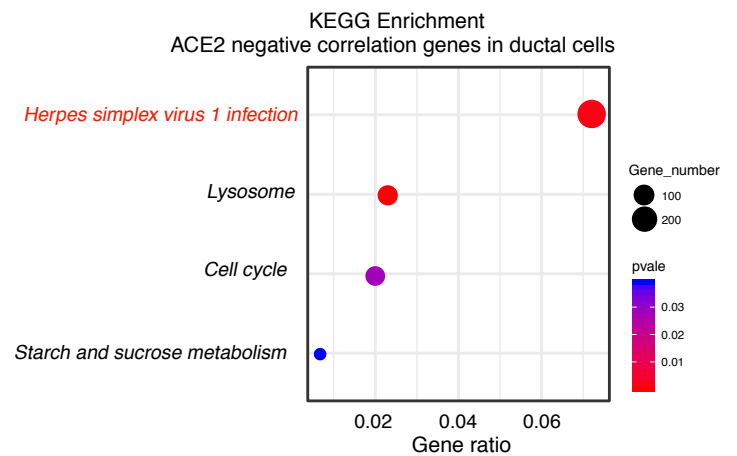

Supplement: ACEL-19-e13168-s001.pdf [file ACEL-19-e13168-s001.pdf]
